# Supplementary material for: School performance after experiencing trauma: a longitudinal study of school functioning in survivors of the Utøya shootings in 2011
Source: PubMed Central journal article supplement (PMC4864847; doi:10.3402/ejpt.v7.31359), 2016-05-10
Supplement: EJPT-7-31359-s002.pdf [file EJPT-7-31359-s002.pdf]

Radzenie sobie w szkole po traumie strzelaniny na wyspie Utøya w 2011 r. wśród osób ocalałych - badanie podłużne.

Ida Frugård Strøm, Jon-Håkon Schultz, Jon-Håkon Schultz, Tore Wentzel-Larsen, Tore Wentzel-Larsen, Grete Dyb, Grete Dyb

**Wprowadzenie:** Psychologiczne skutki ataków terrorystycznych są dokładnie udokumentowane. Niewiele jednak wiadomo na temat skutków ataku terrorystycznego na radzenie sobie w szkole przez osoby, które taki atak przeżyły.

**Cel:** Celem niniejszego badania była ocena radzenia sobie w szkole, przejawiającego się w wynikach szkolnych, liczby nieobecności oraz korzystania ze wsparcia społecznego w szkole wśród osób ocalałych po traumie strzelaniny na wyspie Utøya w Norwegii.

**Metoda:** W badaniu podłużnym uczestniczyła próba 64 uczniów trzeciego roku szkoły średniej, którzy przeżyli tego rodzaju traumę.

**Wyniki:** Wykazano znaczące obniżenie ocen szkolnych ( $p < 0.001$ ) rok po tragedii w porównaniu do funkcjonowania szkolnego uczniów rok przed tragedią. Zauważono też istotny wzrost nieobecności szkolnych. Jednakże odnotowano wzrost satysfakcji z korzystania z wsparcia społecznego w szkole.

**Konkluzje:** Wyniki tych badań wskazują na znaczące obniżenie ocen szkolnych oraz wzrost nieobecności wśród uczniów, którzy przeżyli nieniejszą tragedię. Jednakże odnotowano też wzrost satysfakcji ze wsparcia społecznego otrzymywanego w szkole, co może nastrajać optymistycznie na temat radzenia sobie w szkole po traumie ataku terrorystycznego.

**Słowa kluczowe:** atak terrorystyczny, trauma, nastolatek, radzenie sobie w szkole, oceny szkolne, nieobecność, wsparcie społeczne w szkole.

Name of translator: Marcin Rzeszutek, University of Finance and Management in Warsaw, Poland

**Citation:** European Journal of Psychotraumatology 2016, 7: 31359 - <http://dx.doi.org/10.3402/ejpt.v7.31359>
